# Supplementary material for: A Novel Measure of Chromosome Instability Can Account for Prognostic Difference in Multiple Myeloma
Source: PubMed Central journal article supplement (PMC3688789; doi:10.1371/journal.pone.0066361), 2013-06-20
Supplement: pone.0066361.s001.pdf [file pone.0066361.s001.pdf]

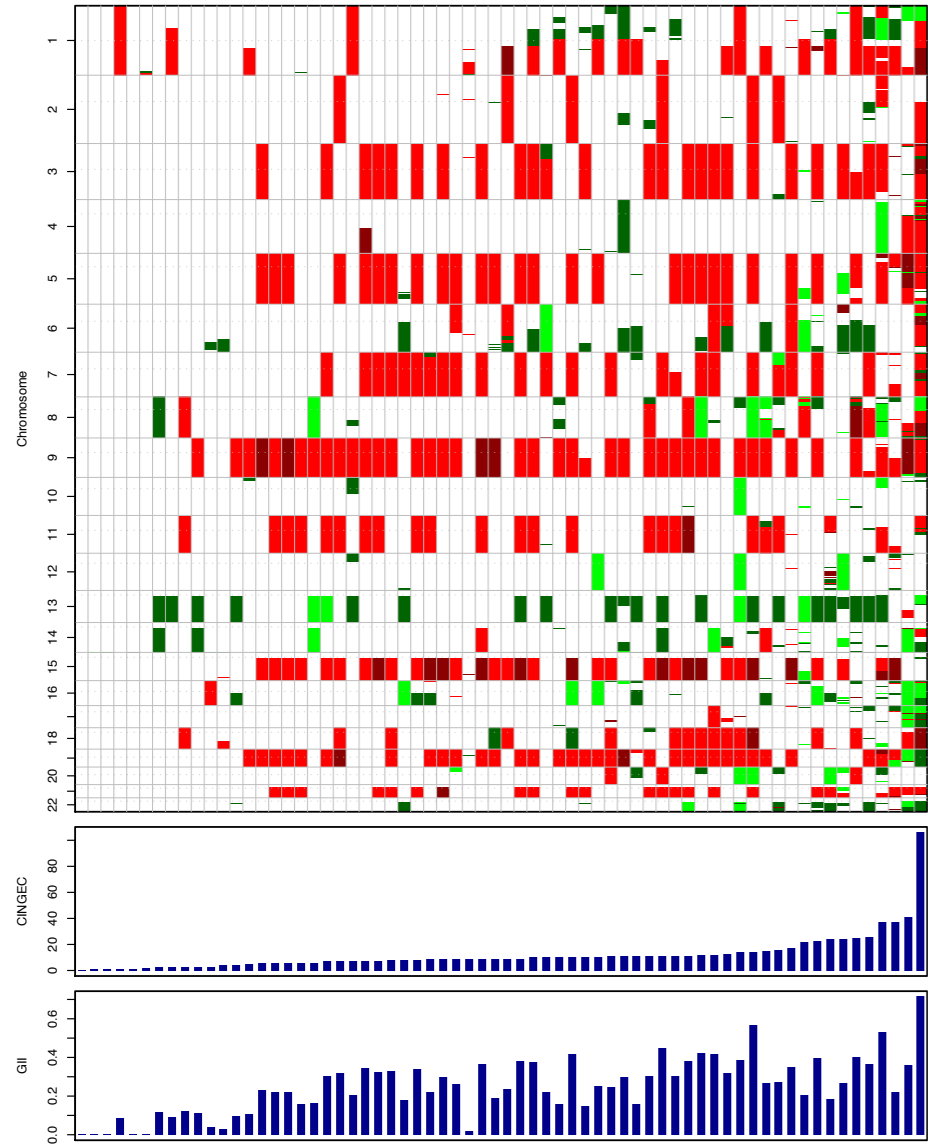

(a)

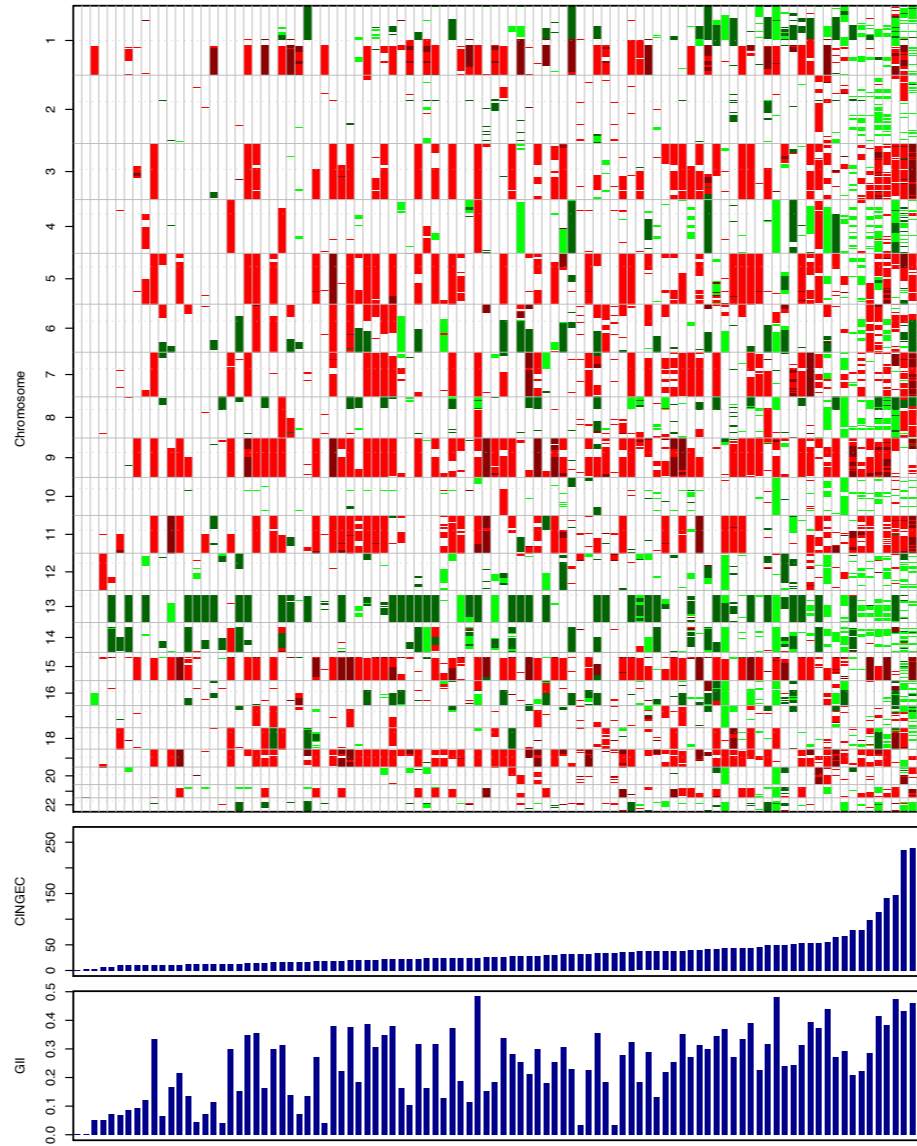

(b)

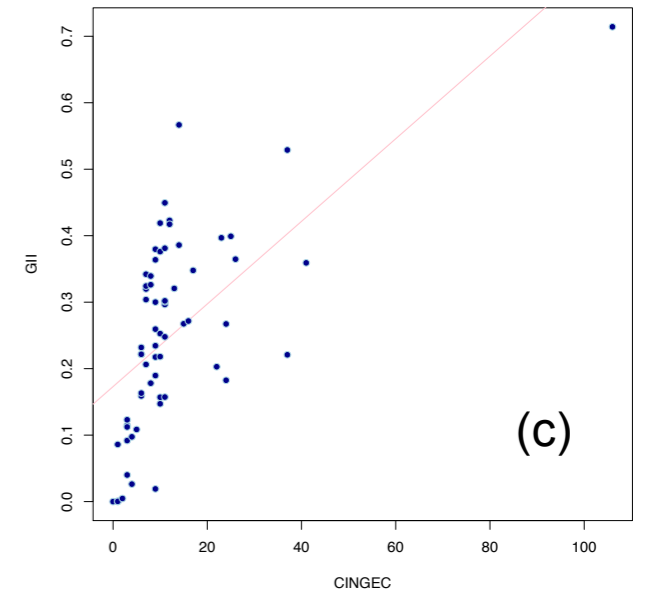

(c)

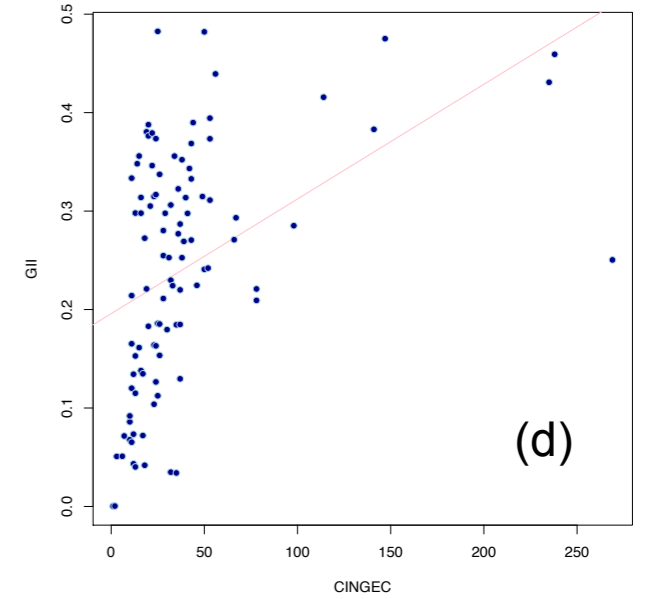

(d)
