# Supplementary material for: A Novel Measure of Chromosome Instability Can Account for Prognostic Difference in Multiple Myeloma
Source: PubMed Central journal article supplement (PMC3688789; doi:10.1371/journal.pone.0066361), 2013-06-20
Supplement: pone.0066361.s005.pdf [file pone.0066361.s005.pdf]

**CINGECS**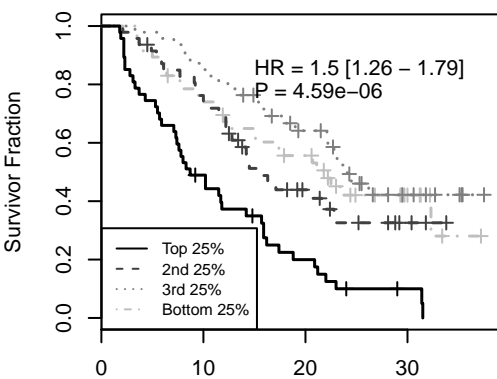

OS (Month)

**PI**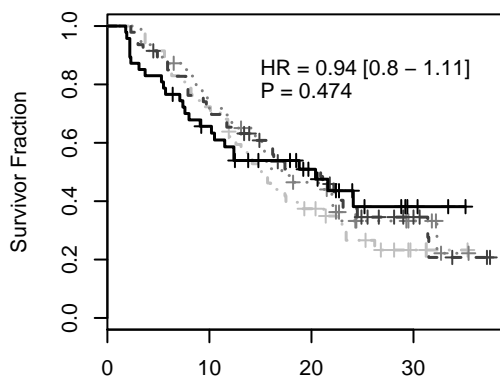

OS (Month)

**CNTI**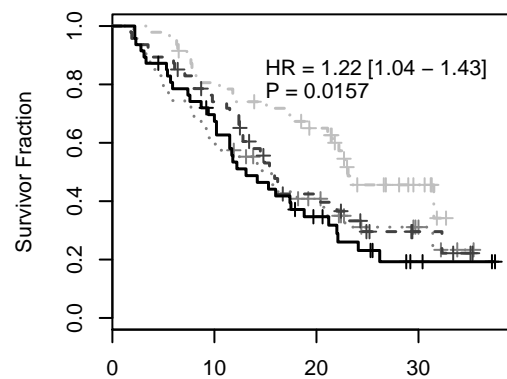

OS (Month)

**EMC92**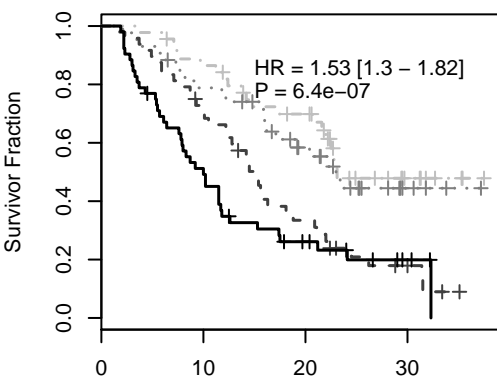

OS (Month)

**UAMS**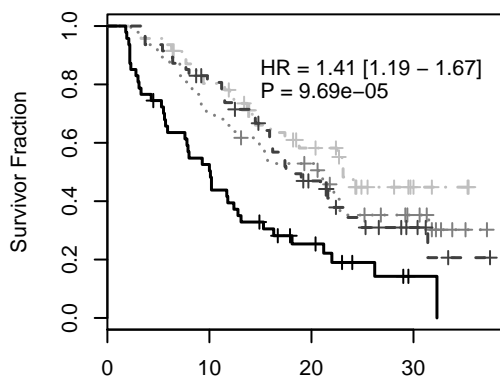

OS (Month)

**IFM**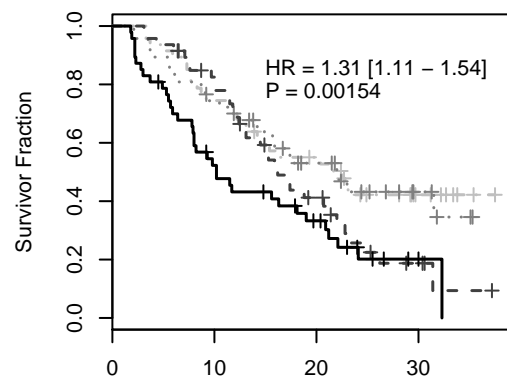

OS (Month)

**HMCL7**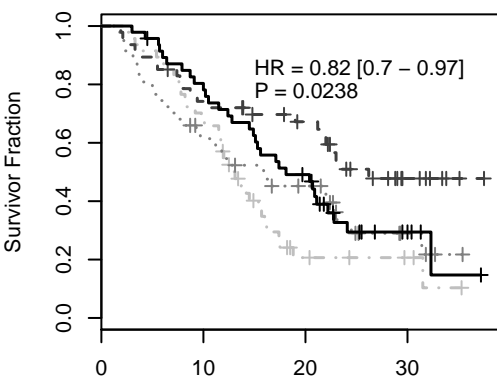

OS (Month)

**HZDCD**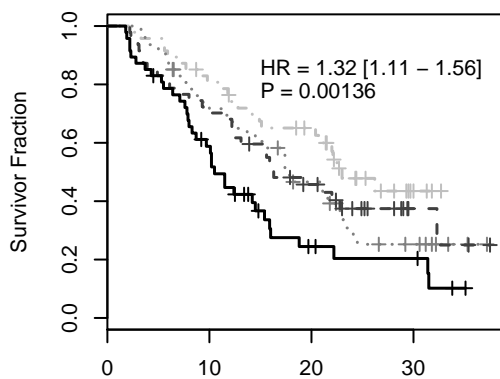

OS (Month)

**CIN70**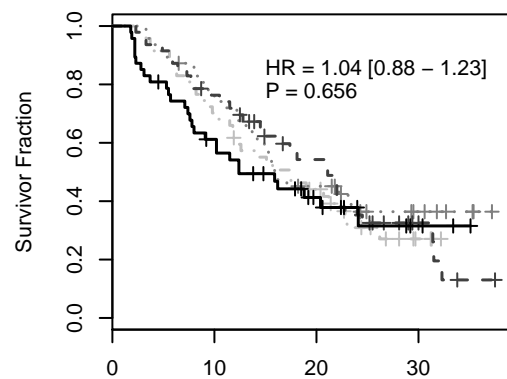

OS (Month)

**CINSARC**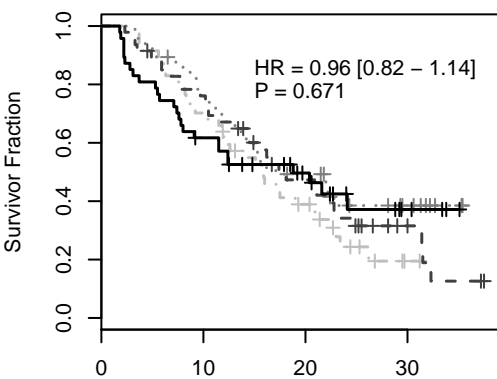

OS (Month)
